# Supplementary material
Source: PubMed Central journal article supplement (PMC8792096)

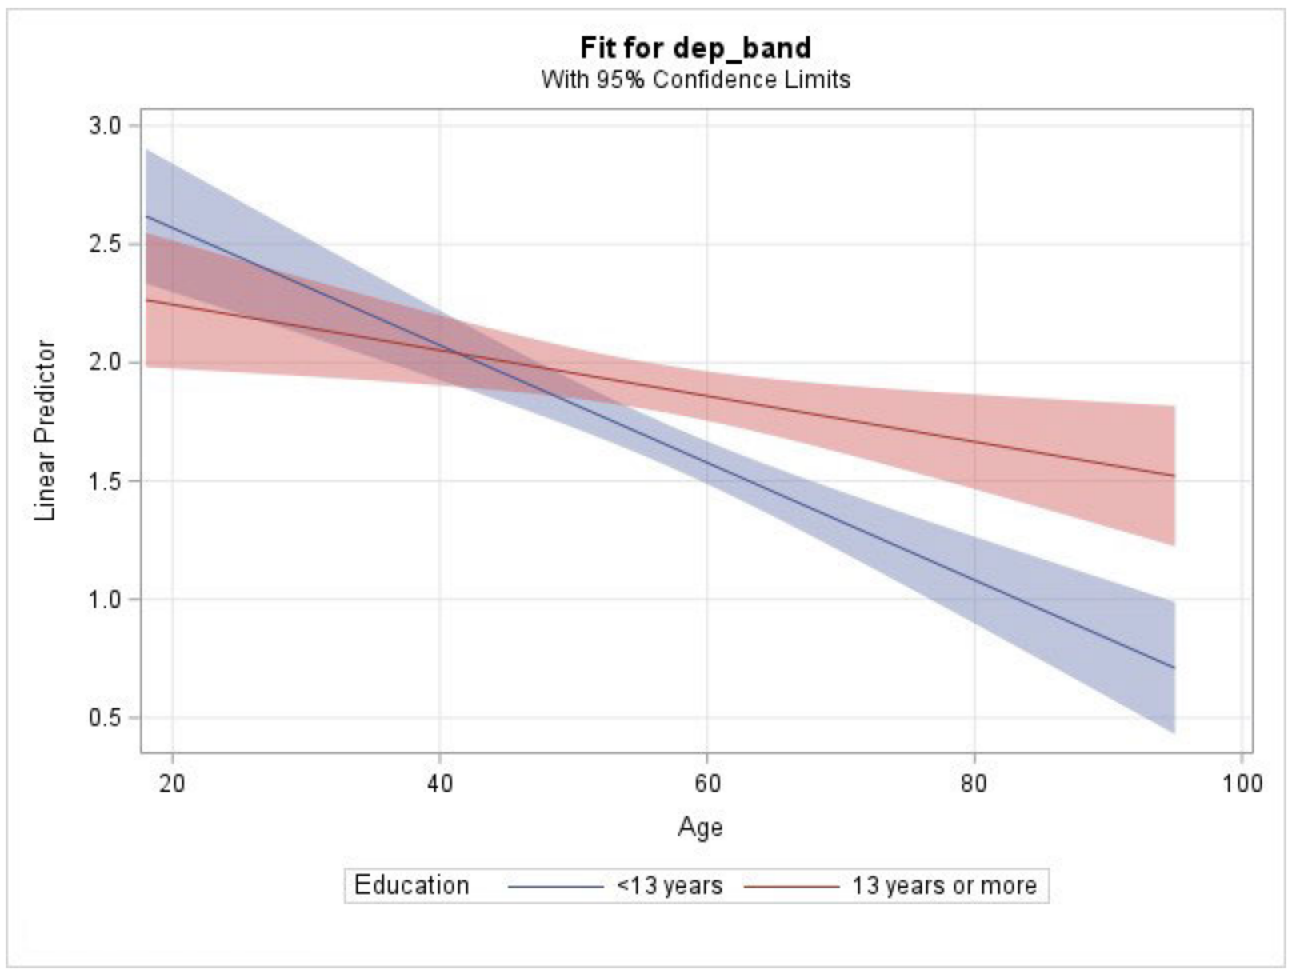

Supplement: NIHMS1728236-supplement-fS1.pdf [file NIHMS1728236-supplement-fS1.pdf]

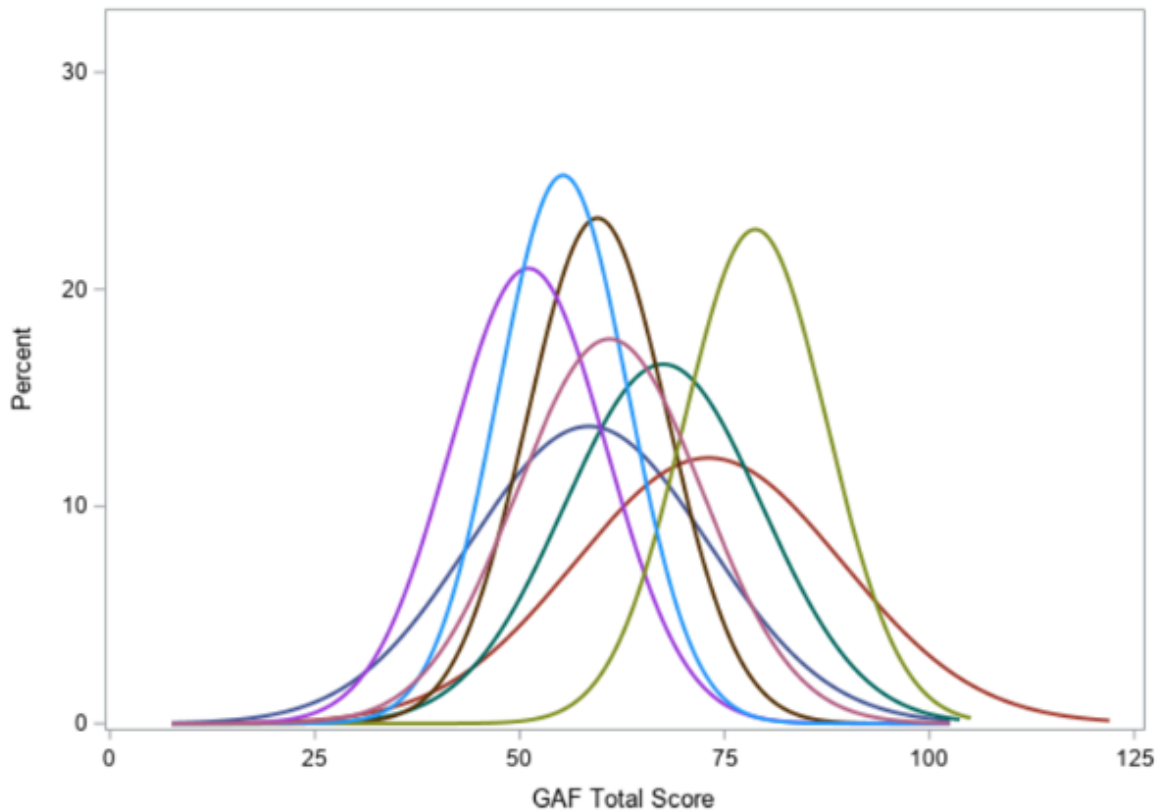

study Inflam TMU McLe CAE GERISA TMU2 DOBI2 Yale

Supplement: NIHMS1728236-supplement-fS2.pdf [file NIHMS1728236-supplement-fS2.pdf]
